# Supplementary material for: Association between renal function and cardiovascular mortality: a retrospective cohort study of elderly from health check-up
Source: HighWire-hosted journal article supplement (doi:10.1136/bmjopen-2021-049307), 2021-09-01
Supplement: bmjopen-2021-049307supp001_data_supplement.pdf [file bmjopen-2021-049307supp001_data_supplement.pdf]

Table S1. The estimated risks of factors associated with cardiovascular deaths by gender (sdRH model)

| Variables                                                         | Male |        |      | Female |        |      |
|-------------------------------------------------------------------|------|--------|------|--------|--------|------|
|                                                                   | HR   | 95% CI |      | HR     | 95% CI |      |
|                                                                   |      | LCI    | UCI  |        | LCI    | UCI  |
| <b>Age (65-74 as a reference)</b>                                 |      |        |      |        |        |      |
| age $\geq$ 75                                                     | 2.58 | 2.36   | 2.83 | 3.18   | 2.81   | 3.61 |
| <b>BMI (18.5 <math>\leq</math> BMI &lt; 24 as a reference)</b>    |      |        |      |        |        |      |
| BMI < 18.5                                                        | 1.38 | 1.17   | 1.63 | 1.29   | 1.00   | 1.67 |
| 24 $\leq$ BMI < 27                                                | 0.92 | 0.84   | 1.00 | 0.95   | 0.83   | 1.09 |
| 27 $\leq$ BMI < 30                                                | 0.86 | 0.76   | 0.97 | 0.93   | 0.78   | 1.11 |
| 30 $\leq$ BMI < 35                                                | 0.99 | 0.81   | 1.21 | 1.01   | 0.79   | 1.29 |
| BMI $\geq$ 35                                                     | 1.44 | 0.80   | 2.60 | 1.27   | 0.72   | 2.25 |
| <b>Having heart disease history</b>                               | 1.05 | 0.96   | 1.14 | 1.07   | 0.94   | 1.22 |
| <b>Having hypertension history</b>                                | 0.95 | 0.87   | 1.03 | 0.97   | 0.84   | 1.11 |
| <b>Having diabetes mellitus history</b>                           | 1.12 | 1.04   | 1.22 | 1.20   | 1.06   | 1.36 |
| <b>Smoking status (non-smoking as a reference)</b>                |      |        |      |        |        |      |
| smoking occasionally                                              | 0.97 | 0.89   | 1.05 | 1.18   | 0.77   | 1.81 |
| smoking every day                                                 | 1.09 | 0.94   | 1.25 | 1.25   | 0.84   | 1.86 |
| <b>Drinking status (non-drinking as a reference)</b>              |      |        |      |        |        |      |
| drinking                                                          | 0.97 | 0.89   | 1.05 | 1.03   | 0.85   | 1.26 |
| <b>Renal function ( eGFR <math>\geq</math> 90 as a reference)</b> |      |        |      |        |        |      |
| 90 > eGFR $\geq$ 60                                               | 1.94 | 1.26   | 2.98 | 1.61   | 1.03   | 2.52 |
| 60 > eGFR $\geq$ 45                                               | 2.85 | 1.85   | 4.39 | 2.41   | 1.53   | 3.81 |
| eGFR < 45                                                         | 4.03 | 2.60   | 6.24 | 4.02   | 2.50   | 6.44 |
| <b>eGFR Decline (slope &gt; -5 as a reference)</b>                |      |        |      |        |        |      |
| slope $\leq$ -5                                                   | 2.83 | 2.56   | 3.12 | 2.73   | 2.36   | 3.17 |
| <b>Urine protein (- as a reference)</b>                           |      |        |      |        |        |      |
| +/-, +, ++                                                        | 1.37 | 1.25   | 1.50 | 1.55   | 1.35   | 1.79 |
| +++, ++++                                                         | 1.88 | 1.46   | 2.42 | 2.84   | 1.89   | 4.26 |
